# Supplementary material
Source: publisher site journal article supplement (https://www.dovepress.com/article/556891)
Supplement: Supplementary file 1 [file 556891%20Revised%20%2509Supplementary%20data.docx]

**Supplementary Table 1.** Primer sequences for RT-qPCR.

| **Gene** | **Forward** | **Reverse** |
| --- | --- | --- |
| β-actin | CATGTACGTTGCTATCCAGGC | CTCCTTAATGTCACGCACGAT |
| PLK1 | ATTCCCAAGCACATCAACCC | GGAGACGGGCAGGGATATAG |
| CDC25C | TGTCAACCCAGAAACAGTGG | CTGGATGTGTCCTCCCAGAT |
| CCNB1 | AATAAGGCGAAGATCAACATGGC | TTTGTTACCAATGTCCCCAAGAG |
| CDK1 | AAACTACAGGTCAAGTGGTAGCC | TCCTGCATAAGCACATCCTGA |

|  | **Healthy(n=17)** | **Sepsis(n=17)** |
| --- | --- | --- |
| **Gender (male, %)** | 8(47%) | 13(76%) |
| **Ages (years)** | 59.8±15.8 | 62.4±13.1 |
| **BMI (kg/m2)** | 23.7±4.6 | 23.1±3.8 |
| **Neutrophils (109/L)** | 3.9±2.0 | 9.6±6.5** |
| **Monocytes (109/L)** | 0.5±0.2 | 0.6±0.4** |
| **Lymphocytes (109/L)** | 1.8±0.7 | 0.9±0.6 |
| **Platelets (109/L)** | 204.9±54.9 | 165.8±167.2 |
| **Hemoglobin (g/L)** | 120.7±30.5 | 76.4±18.2** |
| **CRP (mg/L)** | 38.1±60.0 | 119.3±97.2** |
| **Albumin(g/L)** | 42.2±4.0 | 28.3±7.5** |
| **PT(s)** | 11.7±0.5 | 15.5±2.9** |
| **APTT(s)** | 26.8±1.9 | 37.4±11.1** |
| **D-dimer(mg/L)** | 1.3±1.9 | 7.3±5.1** |
| **Fibrinogen(mg/dL)** | 287.2±102.0 | 402.5±187.2* |
| **IL-6(pg/ml),median(IQR)** | 2.0(1.1-5.5) | 243.4(113-395)** |
| **TB(umol/L)** | 9.1±3.7 | 47.1±53.3* |
| **MAP(mmHg)** | 95.4±8.9 | 86.2±16.1* |
| **Cr(umol/L)** | 77.59±17.0 | 143.88±89.8** |

**Supplementary Table 2.** Baseline of characteristics of healthy volunteers and sepsis patients enrolled in the group.

BMI：body mass index; CRP:C reactive protein; IQR:interquartile range; TB:total bilirubin; MAP:mean arterial pressure; Cr:creatinine

Data are expressed by percentage or mean±standard deviation [SD],median (interquartile range[IQR]), **P*＜0.05 versus Healthy, ***P*＜0.01 versus Healthy.


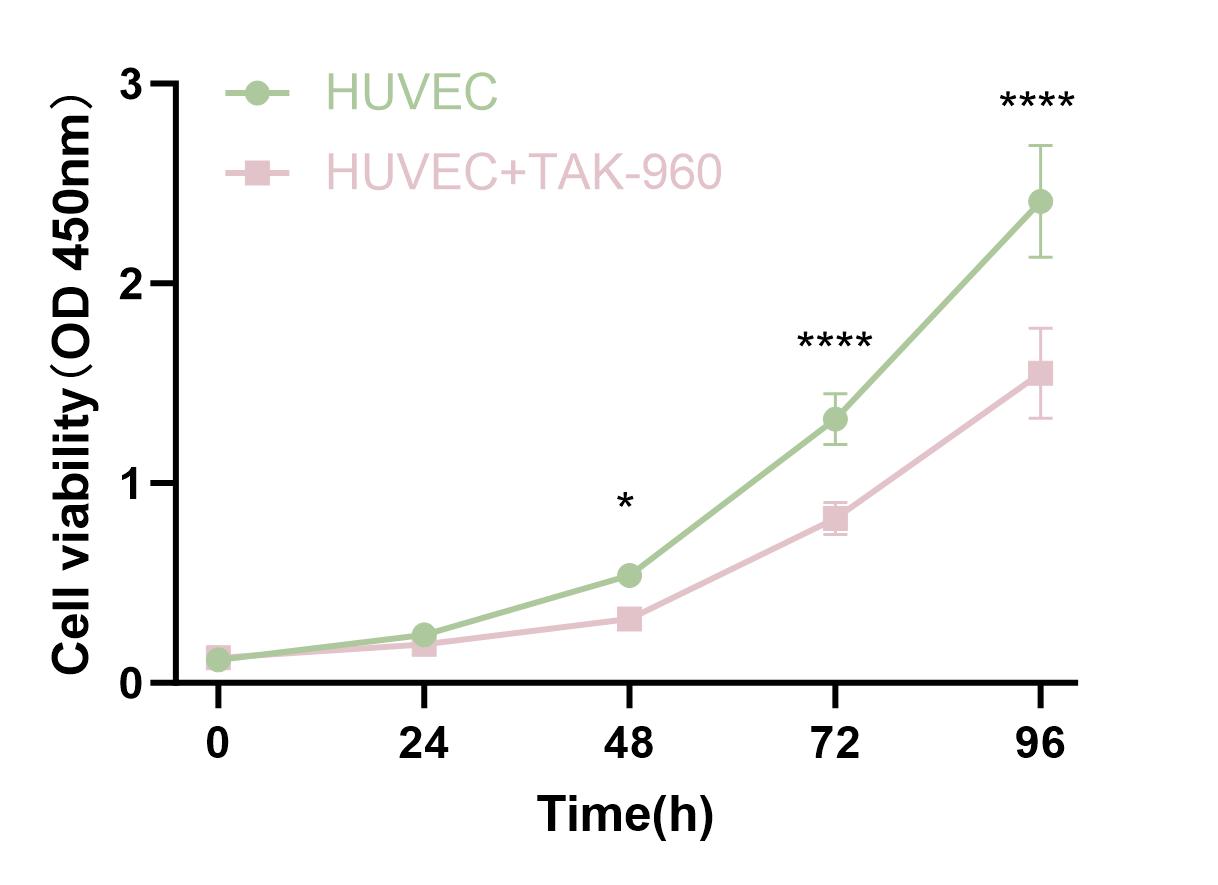


A

**
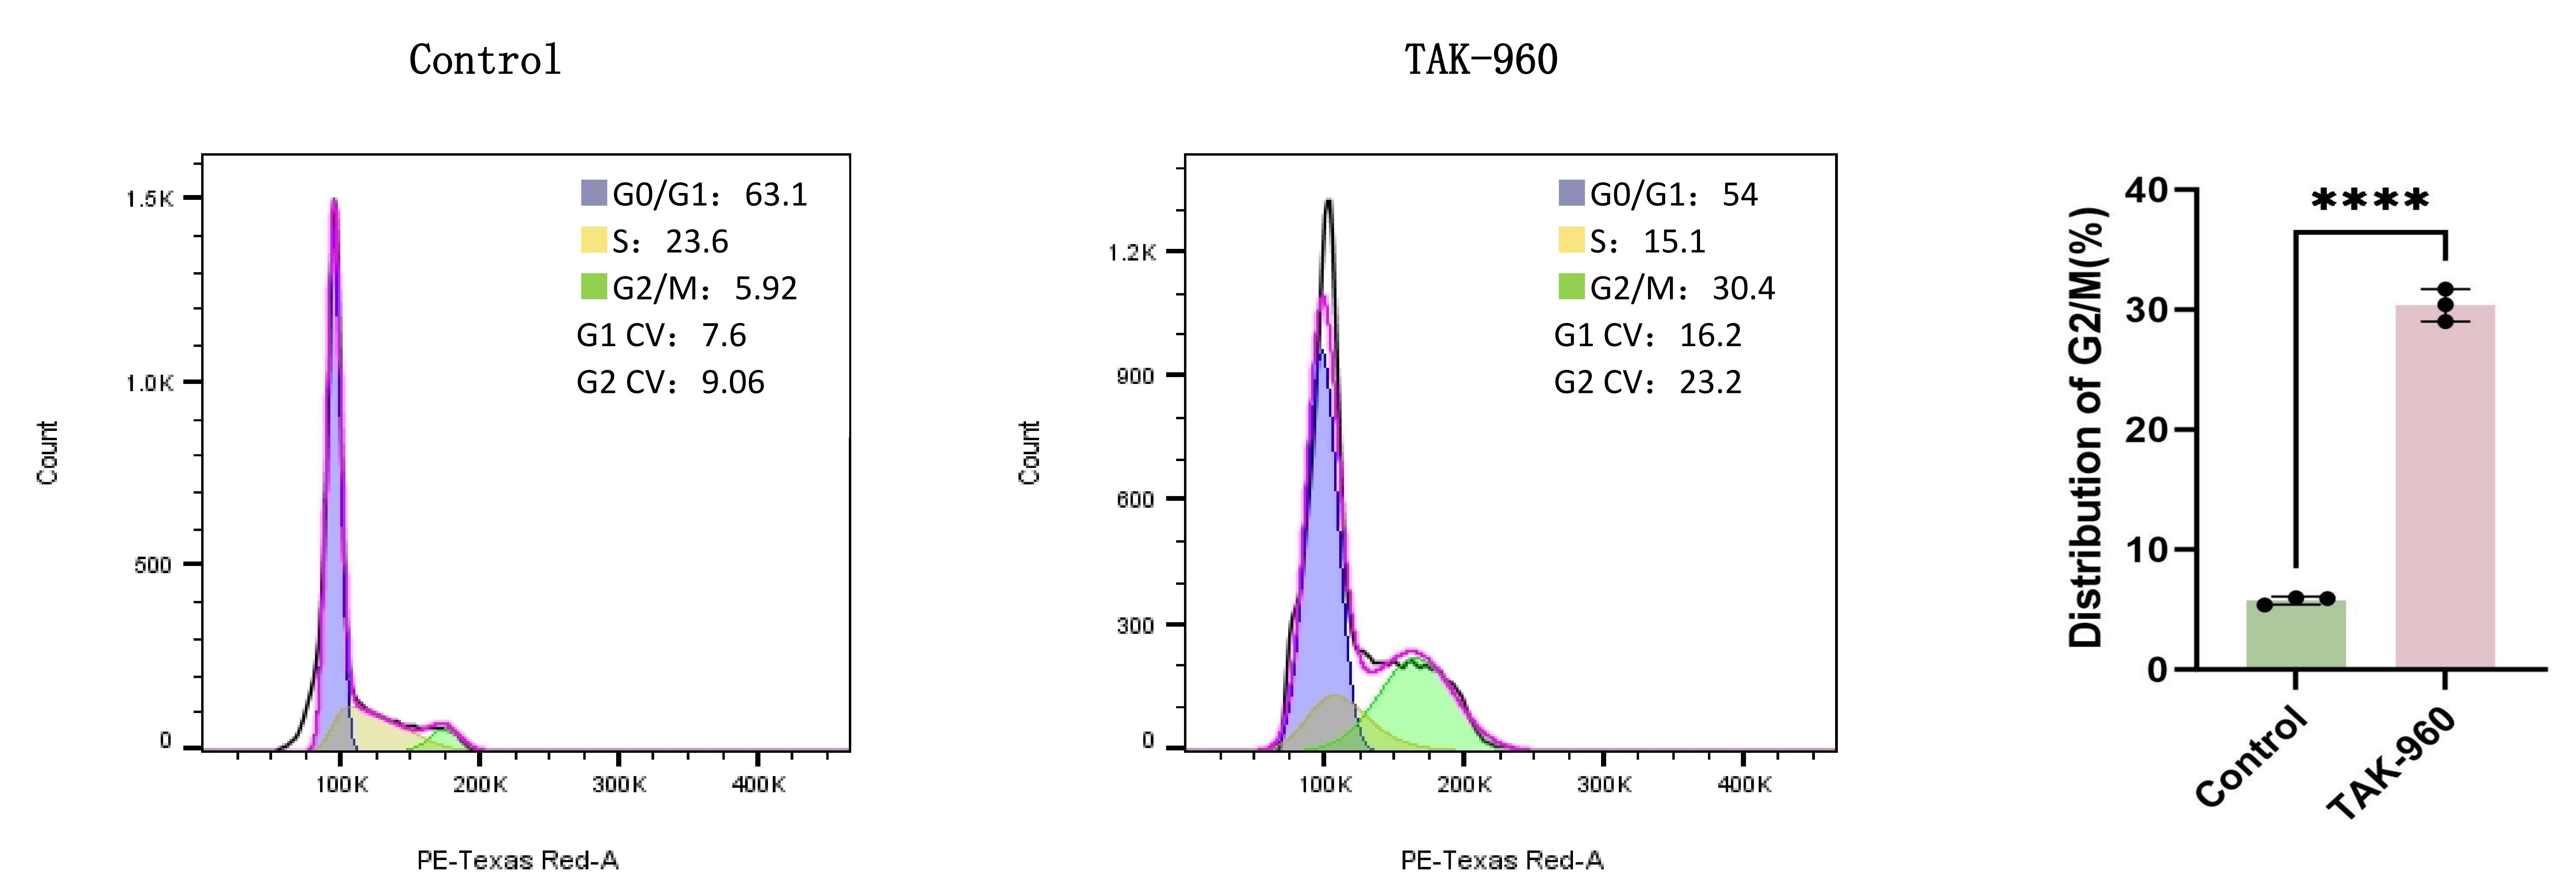
Supplementary Figure 1.** The PLK1 inhibitor TAK-960(8nM) inhibits HUVEC activity and induces G2/M phase arrest. (A) CCK-8 cell viability assay of HUVECs (n=6). (B) Flow cytometric analysis of the cell cycle of HUVECs(n = 3).

B
